# Supplementary material
Source: PubMed Central journal article supplement (PMC6450793)
Supplement: supp_7.2.E190_2018-0155-original-submission.pdf [file supp_7.2.E190_2018-0155-original-submission.pdf]

1 **Title:** The information needs of patients, professionals and the public with regards to medical aid  
 2 in dying: a qualitative study

3 **Authors:**

4 Antoine Boivin, MD, PhD<sup>1,2,3</sup>  
 5 François-Pierre Gauvin, PhD<sup>1, 5</sup>  
 6 Geneviève Garnon, PhD<sup>1</sup>  
 7 Agustina Gancia, PhD<sup>1</sup>  
 8 Ghislaine Rouly<sup>1</sup>  
 9 Isabelle Marcoux, PhD<sup>4</sup>  
 10 Pascale Lehoux, PhD<sup>3</sup>

- 11
- 12 1. Centre of Excellence on Partnership with Patients and the Public
- 13 2. Department of family and emergency medicine, University of Montreal
- 14 3. Department of management, evaluation and health policy, University of Montreal School
- 15 of Public Health.
- 16 4. Interdisciplinary school of health sciences, University of Ottawa
- 17 5. *Department of Health Research Methods, Evidence, and Impact, Centre for Health*
- 18 *Economics and Policy Analysis, McMaster University*
- 19

20 **Corresponding author:**

21 Antoine Boivin, MD PhD  
 22 [Antoine.boivin@umontreal.ca](mailto:Antoine.boivin@umontreal.ca)  
 23 (514) 775-5064

24 Center of Excellence for Partnership with Patients and the Public  
 25 University of Montreal Hospital Research Center (CRCHUM)  
 26 900, rue Saint-Denis, S03.304  
 27 Montréal (Québec) H2X 0A9  
 28 Canada

29

30 **Word count (abstract):** 225 words

31 **Word count (Text):** 2513

32 **Contributor's statement:** AB, FPG, GG, IM and PL contributed to study design. GG, FPG, AB,  
 33 GR contributed to the analysis. AB, GG and AG drafted the article. All authors reviewed and  
 34 approved the final article.

35 **Checklist for appropriate reporting guideline:** COREQ for qualitative data analysis  
 36 (<https://academic.oup.com/intqhc/article/19/6/349/1791966>)

37 **Acknowledgements:** We would like to thank the members of the scientific committee, Dr. David  
 38 Lussier (Geriatrician, University Institute of Geriatrics of Montreal) and Me Pierre Deschamps

1  
2  
3 39 (lawyer-ethicist, Health Research Group and Law, McGill University) for sharing their expertise,  
4  
5 40 as well as the partners that have contributed to the implementation of the forums. We would like  
6  
7 41 to highlight the contribution of Malorie Flon and Myriam Fahmy to the facilitation of the face-to-  
8  
9 42 face forum and Mr. Victor Fontaine to the animation of the online forum. Finally, the forums  
10  
11 43 would not have been possible without the engagement of citizens, patients, caregivers and health  
12  
13 44 professionals from across Canada Quebec. Thank you very much for sharing your experiences  
14  
15 45 and knowledge at the forums.  
16  
17  
18  
19

20 46 **Abstract:**

21  
22 47 **Background:** In 2016, the Canadian government legalized medical assistance in dying (MAiD)  
23  
24 48 for adults with terminal illness. The objective of this study is to explore the information needs of  
25  
26 49 health professionals and members of the public regarding MAiD. **Methods:** This is a qualitative  
27  
28 50 study using a one-day face-to-face forum, followed by a three-week online forum across the  
29  
30 51 province of Quebec. Deliberations were prompted by short informational videos about MAiD. A  
31  
32 52 thematic analysis was performed to identify key information needs. **Results:** Eighty-five health  
33  
34 53 professionals and members of the public (patients, caregivers and citizens) identified a majority  
35  
36 54 of common information needs on the definition, eligibility criteria, medical practice and  
37  
38 55 evaluation procedures for MAiD that varied along different stages of the patient's life journey.  
39  
40 56 Forty-three people participated in the face-to-face meeting and 42 people participated online.  
41  
42 57 Participants highlighted the need to be informed about issues that go beyond the medical and  
43  
44 58 legal aspects of MAiD (eg. relational, ritual, personal and interpersonal aspects). Key principles  
45  
46 59 that should drive future information strategy include the development of a shared and  
47  
48 60 comprehensive information base both available to professionals and members of the public.  
49  
50  
51  
52  
53  
54  
55  
56  
57  
58  
59  
60

1  
2  
3  
4  
5  
6  
7  
8  
9  
10  
11  
12  
13  
14  
15  
16  
17  
18  
19  
20  
21  
22  
23  
24  
25  
26  
27  
28  
29  
30  
31  
32  
33  
34  
35  
36  
37  
38  
39  
40  
41  
42  
43  
44  
45  
46  
47  
48  
49  
50  
51  
52  
53  
54  
55  
56  
57  
58  
59  
60

61 **Interpretation:** These findings call for concerted efforts to build a common information base -  
62 covering dimensions that go beyond the medical and legal aspects of MAiD - to facilitate  
63 informed conversations between patients, professionals and members of the public.

64 **MeSH:** End-of-life; Shared Decision-Making; Consultation; Seeking information; Public Policy

65

1  
2  
3 67  
45 68 **Introduction**  
6  
7

8 69 In 2014, the province of Quebec adopted the Act Respecting End-of-life Care (1),  
9  
10 70 allowing competent adults with terminal illness to request medical assistance in dying (MAiD).  
11  
12  
13 71 MAiD is defined as "care consisting in the administration by a physician of medications or  
14  
15 72 substances to an end-of-life patient, at the patient's request, in order to relieve their suffering by  
16  
17 73 hastening death." (1) At the federal level, the Supreme Court of Canada, in *Carter v Canada*,  
18  
19 74 declared that criminal code prohibition of MAiD was in violation with the Canadian Charter of  
20  
21  
22 75 Rights and Freedoms. (2) In June 2016, the Canadian government passed a federal legislation  
23  
24 76 (Bill C-14) amending the Criminal Code to allow MAiD across the country. (3)

25  
26  
27 77 Patients' preferences towards end-of-life care have been abundantly studied. (4-6).  
28  
29 78 However, an important degree of confusion on MAiD has been noted among members of the  
30  
31 79 public and professionals. (7-9) One recent study showed that Quebec healthcare professionals  
32  
33 80 confuse MAiD with other end-of-life practices, such as treatment withdrawal and the use of drugs  
34  
35 81 for symptom management. (10) Yet, the literature addressing information needs about MAiD  
36  
37 82 remains scarce and rarely focus on the respective needs of patients and professionals. (11-17)  
38  
39 83 This knowledge gap is a barrier for the development of relevant and effective public information  
40  
41 84 strategies on MAiD. This study aims to present key findings from a deliberative forum  
42  
43 85 highlighting key information needs of healthcare professionals and the public, and areas where  
44  
45 86 these needs overlap and diverge.

46  
47  
48  
49 87 **Methods**  
50  
5152  
53 88 *Deliberative forum design*  
54  
55

1  
2  
3 89 We conducted a qualitative study using deliberation for data elicitation and thematic  
4  
5 90 content analysis for data synthesis(18). Deliberation refers to a dialogue that involves the careful  
6  
7 91 weighing of reasons for or against a proposition. (19) Deliberative forums go beyond traditional  
8  
9  
10 92 public consultation by incorporating at least three key elements: 1) provision of information to  
11  
12 93 participants about the issue being discussed; 2) opportunity for interactive discussion among  
13  
14 94 participants; and 3) an explicit process for collecting individual or collective input. (20)  
15  
16  
17 95 Deliberation creates an opportunity to move away from raw public opinions elicited by traditional  
18  
19 96 consultation mechanisms towards more informed and responsible public judgment about complex  
20  
21 97 health-system issues. (21)  
22  
23  
24 98 In order to balance depth and geographical scope, we conducted deliberative forums in two  
25  
26  
27 99 formats: 1) a one-day face-to-face forum with participants from the greater Montreal area held in  
28  
29 100 a public community building; and 2) a three-week online forum with participants from across the  
30  
31 101 province of Quebec, the only Canadian province where MAiD was legal at the time of the study.  
32  
33  
34 102 Its goal was to extend the forum to participants living outside Montreal in other rural and urban  
35  
36 103 areas of Quebec. The design of these forums was based on previous deliberation studies. (22, 23)  
37  
38 104 The forum discussions were introduced by a short video capsule produced with legal and medical  
39  
40  
41 105 experts and was structured around the following topics,: 1) what is MAiD; 2) what are the  
42  
43 106 eligibility criteria; 3) how is MAiD practiced; 4) how are practices evaluated and monitored. In  
44  
45 107 the face-to-face deliberation, a professional moderator introduced questions during the plenary  
46  
47 108 session, before participants were discussed each question in small groups. In the online forum, a  
48  
49 109 professional moderator also introduced videos and questions, and provided summaries of  
50  
51  
52 110 discussion on a weekly basis to facilitate discussions.  
53  
54  
55  
56  
57  
58  
59  
60

1  
2  
3 111 Participants targeted for the study included members of the public (citizens, patients, and  
4  
5 112 caregivers), and healthcare professionals (physicians, nurses, pharmacists, managers, social  
6  
7 113 workers). Two strategies were used to recruit participants: 1) a call for applications to the patient  
8  
9 114 partner network of the Patient Partnership and Collaboration Unit at the Faculty of Medicine,  
10  
11 115 Université de Montréal; and 2) a call for applications via social media (Twitter and Facebook)  
12  
13 116 and mailing lists of partner professional and community organizations across the province of  
14  
15 117 Quebec.  
16  
17  
18  
19

20 118 Interested candidates were asked to submit their application online. A purposeful  
21  
22 119 sampling strategy was used to recruit a diverse group of participants based on the following  
23  
24 120 criteria: age, gender, socioeconomic status, region, health status, personal experience with end-  
25  
26 121 of-life care as patient or caregiver, and attitude toward MAiD. Health professionals were also  
27  
28 122 selected to include a diversity of participants based on: health discipline, experience with end-of-  
29  
30 123 life care, region, and attitude toward MAiD. Participants were compensated for their travel and  
31  
32 124 time. No selected candidates refused or dropped out during the study.  
33  
34  
35  
36

### 37 125 *Data collection and analysis*

38  
39

40 126 For each of the four themes presented in the MAiD videos, participants were asked to  
41  
42 127 reflect on two questions: a) what information was new to them, and b) what questions were left  
43  
44 128 unanswered. Four methods were used to collect data on the deliberation content and process  
45  
46 129 during the face-to-face and online forums. For the face-to-face forums 1) audio-digital recordings  
47  
48 130 of participants' discussions and 2) "placemats" were used by participants to write and compile  
49  
50 131 individual and collective responses. For the online forums 3) written exchanges during the online  
51  
52 132 forum; and 4) notes from two non-participant observers.  
53  
54  
55  
56  
57  
58  
59  
60

1  
2  
3 133 The face-to-face forum was moderated by a professional female moderator, independent  
4  
5 134 from the research team and hired from a not-for-profit organization with expertise in citizen  
6  
7 135 engagement (Institut du Nouveau Monde), whereas the online forum was moderated by a male  
8  
9 136 independent moderator from the same organization. The forum moderators proactively ensured  
10  
11  
12  
13 137 all participants provided their input and ensured that all topics were explored in depth. No repeat  
14  
15 138 or follow-up interviews were conducted.

16  
17  
18  
19 139 A qualitative thematic content analysis was used to synthesize the key information needs that  
20  
21 140 emerged from the forums and to identify key principles that could guide a public information  
22  
23 141 strategy on MAiD(24). Thematic content analysis was chosen because we sought categories of  
24  
25 142 themes and questions raised by participants that could drive information strategies. We used a  
26  
27 143 combination of deductive approach (using broad categories related to the patients' life journey)  
28  
29 144 and inductive approaches (driven by data using emerging categories). (24) All data were coded  
30  
31 145 by two PhD-level research team members (GG, female and FPG, male) and reviewed during  
32  
33 146 analytical meetings with other team members to further refine analyses. Disagreements between  
34  
35 147 the coders were resolved through discussion with the broader research team. Themes were  
36  
37 148 identified within each deliberation session and compared between sessions. The analyses paid  
38  
39 149 particular attention to the convergence and divergence between the perspectives of members of  
40  
41 150 the public and healthcare professionals. Participants were sent a short synthesis of the data and  
42  
43 151 were asked to provide feedback. Inductive thematic saturation was used to inform the completion  
44  
45 152 of data analysis when no more themes emerged (25). Qualitative data analysis was conducted on  
46  
47 153 NVIVO analysis software.  
48  
49  
50  
51  
52  
53  
54  
55  
56  
57  
58  
59  
60

1  
2  
3 154 *Ethics approval*  
4  
5

6 155 The research ethics committee of the Centre hospitalier de l'Université de Montréal approved and  
7  
8  
9 156 monitored this project (# 2015-307). This article follows the Consolidated criteria for reporting  
10  
11 157 qualitative studies (COREQ): 32-item checklist. (26)  
12  
13

14 158 **Results**  
15

16  
17 159 *Participants*  
18  
19

20 160 Eighty-five people participated in the forums, including 50 members of the public and 35  
21  
22 161 health professionals. Forty-three people participated in the face-to-face meeting and 42 people  
23  
24 162 participated online. Among members of the public, 78%(n=39) had personal experience as  
25  
26 163 patients with chronic or incurable illness, 66% (n=33) played the role of a caregiver to a patient  
27  
28 164 with chronic or incurable disease and 22% (n=50) were citizens without personal experience as a  
29  
30 165 patient with chronic or incurable disease. Professionals included physicians (11%, n=4), nurses  
31  
32 166 (20%, n=7), pharmacists (3%, n=1), managers (3%, n=1), clinical ethicists (3%, n=1) and allied  
33  
34 167 health professionals (60%, n=21) such as social workers, psychologists, respiratory therapists,  
35  
36 168 spiritual workers and occupational therapists. A description of participants is provided in Table 1.  
37  
38 169 No participant dropped out of the study.  
39  
40  
41  
42  
43

44 170 **Table 1.** Description of participants  
45  
46

|                      | <b>Members of the public (n, %)</b>                      | <b>Health professionals (n, %)</b>                       |
|----------------------|----------------------------------------------------------|----------------------------------------------------------|
| <b><i>Total</i></b>  | 50                                                       | 35                                                       |
| <b><i>Gender</i></b> | Male (14, 28 % )<br>Female (36, 72 % )                   | Male (5, 14 % )<br>Female (30, 86 % )                    |
| <b><i>Age</i></b>    | 18-45 (8, 16 % )<br>46-64 (20, 40 % )<br>65+ (22, 44 % ) | 18-39 (12, 34 % )<br>40-50 (6, 17 % )<br>51+ (17, 49 % ) |



|                                    |                                                                                                                                                     |                                                                                                                            |
|------------------------------------|-----------------------------------------------------------------------------------------------------------------------------------------------------|----------------------------------------------------------------------------------------------------------------------------|
| <b><i>Annual family income</i></b> | Less than 20 000\$ (8, 16 % )<br>20 000\$ to 40 000\$ (16, 32 % )<br>40 000 to 60 000\$ (12, 24 % )<br>60 000\$+ (7, 14 % )<br>No answer (7, 14 % ) | Not available                                                                                                              |
| <b><i>Attitude toward MAiD</i></b> | Very favorable (18, 36 % )<br>Favorable (22, 44 % )<br>Uncertain (6, 12 % )<br>Unfavorable (2, 4 % )<br>No answer (2, 4 % )                         | Very favorable (9, 26 % )<br>Favorable (15, 43 % )<br>Uncertain (8, 23 % )<br>Unfavorable (3, 8 % )<br>No answer (0, 0 % ) |
| <b><i>Region</i></b>               | Urban (28, 56%)<br>Semi-urban (16, 32%)<br>Rural (6, 12%)                                                                                           | Urban (21, 60%)<br>Semi-urban (14, 40%)<br>Rural (0, 0%)                                                                   |

171

## 172 *Overview of Information Needs on MAiD*

173 Our forums on MAiD revealed 32 information needs (Table 2), where 22 were commonly  
174 expressed by members of the public and health professionals, and 10 were specific to members of  
175 the public (none were specific for health professionals). Information needs are presented along  
176 six specific stages of the patient journey with illustrative quotes presented in Table 2.

### 177 *1. Reflections and discussions as the end-of-life approaches*

178 Before receiving a diagnosis of incurable disease, information needs focused on  
179 positioning MAiD among other end-of-life practices and concepts including palliative care,  
180 palliative sedation, euthanasia and assisted suicide. Confusion was expressed among members of  
181 the public about the definition of MAiD, as expressed by the illustrative quote in section one of  
182 Table 2.

183 Participants expressed a general concern for access to MAiD in different end-of-life care  
184 settings (e.g. home, palliative care units, in nursing homes), since it might impact on patients'  
185 decision to receive MAiD. Because provincial and federal legislations on MAiD were adopted

1  
2  
3 186 separately, many participants wondered how both legislations would align and which one would  
4  
5 187 prevail in case of disagreement.  
6  
7

## 8 188 *2. Formulating a request for MAiD*

9  
10

11  
12 189 Participants wondered whether the option of MAiD could put pressure on vulnerable  
13  
14 190 patients, and where MAiD would fit along the full range of options of medical end-of-life care:  
15  
16 191 early, as an option within the continuum of end-of-life care, or later, when there is no other  
17  
18 192 option left. Furthermore, participants' information needs focused on the support provided to  
19  
20 193 patients for decision-making. MAiD cannot be requested through advanced directives, which  
21  
22 194 raised questions about substituted consent for incapable patients (eg. Alzheimer's disease), as  
23  
24 195 members of the public initially believed that patients suffering from degenerative disease could  
25  
26 196 request MAiD before cognitive declines prevent them from doing so. Finally, given the fact that  
27  
28 197 end-of-life care often involves interdisciplinary teams, participants sought to the roles of  
29  
30 198 professionals other than physicians in MAiD.  
31  
32  
33  
34

## 35 199 *3. Evaluating requests*

36  
37

38  
39 200 Once a request is formulated, information needs became more procedural and focused on  
40  
41 201 evaluating patients' eligibility and alignment with legal criteria. Members of the public expressed  
42  
43 202 concern relating to the expected delays for evaluation and whether a request from a patient  
44  
45 203 experiencing psychological distress would be evaluated, considering that some patients could  
46  
47 204 rapidly become incapable of giving consent.  
48  
49

50  
51 205 Many argued that interpreting certain eligibility criteria would be challenging and require  
52  
53 206 interdisciplinary expertise that goes beyond that of physicians. Some questioned whether  
54  
55

1  
2  
3 207 conscientious objection applied to all members of the care team or only to physicians. Questions  
4  
5 208 were raised about available resources for patients who meet legal criteria but their request is  
6  
7 209 denied because of conscientious objection. How disagreement and conflicts get resolved  
8  
9  
10 210 remained a question.  
11  
12

#### 13 211 *4. Communicating decisions*

14  
15

16 212 Members of the public wondered whether patients could reapply with a different  
17  
18 213 physician after a rejected request, and how reluctance would be dealt with. Given concerns about  
19  
20 214 its impact on the therapeutic alliance, professionals and the public wondered if a “communication  
21  
22 215 protocol” would be available to help health professionals announce the evaluation results,  
23  
24 216 particularly in the case of refusal. Participants expected detailed explanations justifying MAiD  
25  
26 217 request decisions, as well as information on alternative care, assuming that a request may be the  
27  
28 218 expression for unmet support needs (eg. psychological support).  
29  
30  
31  
32

#### 33 219 *5. Delivering MAiD*

34  
35

36 220 How communication between the patient and his physician will be ensured between  
37  
38 221 approval and administration of MAiD was formulated more as a preoccupation than an  
39  
40 222 interrogation by both professionals and the public. Concerns about the continuity of palliative  
41  
42 223 care and psychosocial support to patients, relatives and the healthcare team between approval and  
43  
44 224 administration of MAiD, as well as which measures would be adopted to ensure confidentiality  
45  
46 225 were raised.  
47  
48  
49  
50

51 226 The lack of a clear framework as to how information would be shared with relatives and  
52  
53 227 other members of the interdisciplinary team was raised by many.  
54  
55  
56  
57  
58  
59  
60

1  
2  
3 228 The delivery of MAiD, possible medical complications, and how MAiD could be  
4  
5 229 approached with humanity and respect, as opposed to being framed as a technical procedure,  
6  
7 230 raised questions. Many indicated that MAiD is described in the law as a clinical, legal and  
8  
9 231 administrative process, which led to the questions about the possibility to personalize the physical  
10  
11 232 environment by incorporating music, religious rituals and symbols.  
12  
13  
14

15 233 *6. Documenting and evaluating practices*  
16  
17

18 234 Information needs after MAiD practice focused on evaluation and accountability of the  
19  
20 235 physician, healthcare care team, or institution: who evaluates practice (both from a technical and  
21  
22 236 humanity standpoint), and how. The responsibilities of healthcare institutions, professional  
23  
24 237 colleges and the provincial End-of-Life Care Commission raised questions around the presence  
25  
26 238 of potential conflicts of interest and the type of sanctions following malpractice. Finally,  
27  
28 239 participants wished to know how the evaluation results would be made public and for what use.  
29  
30  
31  
32  
33  
34  
35  
36  
37  
38  
39  
40  
41  
42  
43  
44  
45  
46  
47  
48  
49  
50  
51  
52  
53  
54  
55  
56  
57  
58  
59  
60

240 **Table 2.** Information needs of the public and healthcare professionals regarding MAiD

| Stages of patient journey                                    | Common needs expressed by professionals and members of the public                                                                                                                                                                                                                                                                                                | Specific needs expressed by members of the public                                                                                                                                                             | Illustrative quotes                                                                                                                                                                                                                                                                                                                                                                                                                                                                                                                                |
|--------------------------------------------------------------|------------------------------------------------------------------------------------------------------------------------------------------------------------------------------------------------------------------------------------------------------------------------------------------------------------------------------------------------------------------|---------------------------------------------------------------------------------------------------------------------------------------------------------------------------------------------------------------|----------------------------------------------------------------------------------------------------------------------------------------------------------------------------------------------------------------------------------------------------------------------------------------------------------------------------------------------------------------------------------------------------------------------------------------------------------------------------------------------------------------------------------------------------|
| 1. Reflections and discussions as the end of life approaches | <p>Where can MAiD be delivered?</p> <p>How does MAiD align with current (and future) laws?</p> <p>How to interpret the eligibility criteria?</p>                                                                                                                                                                                                                 | <p>How to distinguish MAiD from other end-of-life practices?</p> <p>What are the eligibility criteria to MAiD?</p> <p>How can a patient express his/her last wishes and ensure that it will be respected?</p> | <p><i>“It seems that every time they come up with a new term, there is a whole new semantic field appearing, which escapes to ordinary mortals that are patients.”</i> [public]</p> <p><i>“Currently, the situation is ambiguous as to the role and obligations of some end-of-life care settings that seem to be resisting to the law”</i> [public]</p> <p><i>“Who determines the time it takes (before death) for a patient to be considered in the end-of-life?”</i> [public].</p>                                                              |
| 2. Formulating request for MAiD                              | <p>Who can make a request?</p> <p>To whom a request can be made?</p> <p>Is psychosocial support available when a patient is considering a request?</p> <p>How to create the "openness" to initiate a conversation about MAiD with their relatives and healthcare professionals?</p> <p>Where does MAiD fit along the full range of end-of-life care options?</p> | <p>When a request for MAiD can be made?</p>                                                                                                                                                                   | <p><i>“What are the dispositions of the law for minors, dementia and all those who are not capable to consent? Can the representative of a patient (legal representative, family council, etc.) apply for MAiD?”</i> [professional]</p> <p><i>“How can we create an openness between professionals and patients to discuss properly about all these choices?”</i> [public]</p> <p><i>“...will psychological support be provided? Deciding of the day and time of one’s death is somehow empowering, but nevertheless distressing”</i> [public]</p> |
| 3. Evaluating requests                                       | <p>How are requests evaluated and by whom?</p> <p>If a physician refuses to evaluate a request, how will the request be transferred to another physician?</p> <p>What is the scope of conscientious objection to</p>                                                                                                                                             | <p>What are the expected delays for evaluating a patient request?</p> <p>Can we have access to MAiD if we are experiencing psychological suffering only?</p>                                                  | <p><i>“What is acceptable in terms of reasonable delay? ... If his condition worsens, can the patient get [MAiD] imminently?”</i> [public].</p> <p><i>“If a physician refuses to practice MAiD and relies</i></p>                                                                                                                                                                                                                                                                                                                                  |

|                                   |                                                                                                                                                                                                                                                                                                                                                                                                                                                                                                                                                                                                     |                                                                                                                                                                                                      |                                                                                                                                                                                                                                                                                                                                                                                                                                                                                                                                                                                                                                                                                                                                                                                                                                                                                                                                                                                                                        |
|-----------------------------------|-----------------------------------------------------------------------------------------------------------------------------------------------------------------------------------------------------------------------------------------------------------------------------------------------------------------------------------------------------------------------------------------------------------------------------------------------------------------------------------------------------------------------------------------------------------------------------------------------------|------------------------------------------------------------------------------------------------------------------------------------------------------------------------------------------------------|------------------------------------------------------------------------------------------------------------------------------------------------------------------------------------------------------------------------------------------------------------------------------------------------------------------------------------------------------------------------------------------------------------------------------------------------------------------------------------------------------------------------------------------------------------------------------------------------------------------------------------------------------------------------------------------------------------------------------------------------------------------------------------------------------------------------------------------------------------------------------------------------------------------------------------------------------------------------------------------------------------------------|
|                                   | <p>MAiD?<br/>If there is a disagreement in the evaluation of the request, is there a mediation process?</p>                                                                                                                                                                                                                                                                                                                                                                                                                                                                                         |                                                                                                                                                                                                      | <p><i>on the chief executive officer [to forward the request to another physician], how will the request be assessed in reasonable time? This is an urgent request since, to meet criteria, one must be dying!</i>" [professional]</p>                                                                                                                                                                                                                                                                                                                                                                                                                                                                                                                                                                                                                                                                                                                                                                                 |
| <p>4. Communicating decisions</p> | <p>How are decisions communicated, both in the case of approval and refusal?</p>                                                                                                                                                                                                                                                                                                                                                                                                                                                                                                                    | <p>If a patient changes his/her mind after his/her request is accepted, can he/she re-apply?<br/>Is it possible for a patient to apply to another physician if a first request has been refused?</p> | <p><i>"Will it be possible to see another doctor, if, for instance, I don't meet all the criteria? Is there some form of mediation process?"</i> [public]</p>                                                                                                                                                                                                                                                                                                                                                                                                                                                                                                                                                                                                                                                                                                                                                                                                                                                          |
| <p>5. Delivering MAiD</p>         | <p>Are the necessary resources available in all institutions (and in all regions) to provide MAiD?<br/>What is the waiting time for practicing MAiD once a request is accepted?<br/>What is the role of the healthcare team and relatives during the process?<br/>What support is provided to the care team and relatives before, during and after the administration of MAiD?<br/>What are the possible harms and side-effects associated with administering MAiD?<br/>What measures are in place to preserve the confidentiality of MAiD?<br/>How to humanize the process of delivering MAiD?</p> | <p>How to ensure continuous communication between the patient and his/her physician, from the moment a request is made to the moment MAiD is delivered?</p>                                          | <p><i>"...In a hospital, the doctor often changes every week. Several doctors may see the patient and the interviews are quite short. How can we make sure that [the dialogue] will be done to the patient's satisfaction?"</i> [public]</p> <p><i>Where are the interdisciplinary team and, especially, the relatives? Are they excluded?"</i> [public]</p> <p><i>"Do we have support after? Are there any resources after all these steps? It is a pretty traumatic way to end a life! Nothing is mentioned in the law, as much for the health professionals, as for the patients and their relatives. I know there is an interdisciplinary support group for MAiD... but is it functional?"</i> [professional]</p> <p><i>"What are these drugs [used for MAiD]? Most importantly, what effect do they have on vital organs and on the brain? How can we measure the level of consciousness? Studies have shown that patients in the coma can feel pain even if they look peaceful in the outside!"</i> [public]</p> |

|                                         |                                                                                                                           |                                      |                                                                                                                                                                                                                                                                                                                                                                                                                                                                                                                                                                                                                                                                                                                                                                                                                                                                    |
|-----------------------------------------|---------------------------------------------------------------------------------------------------------------------------|--------------------------------------|--------------------------------------------------------------------------------------------------------------------------------------------------------------------------------------------------------------------------------------------------------------------------------------------------------------------------------------------------------------------------------------------------------------------------------------------------------------------------------------------------------------------------------------------------------------------------------------------------------------------------------------------------------------------------------------------------------------------------------------------------------------------------------------------------------------------------------------------------------------------|
|                                         |                                                                                                                           |                                      | <p><i>“Is the injection method really foolproof? Could it happen, during the process, that something doesn’t work? We thought the patient was dying, but a problem occurs! Are there ways to solve these kinds of problems?” [professional]</i></p> <p><i>“How can a hospital medical environment provide a meaningful set up for the patient receiving MAiD? For instance, would candles, usually not allowed in hospitals, be allowed for MAiD?” [professional]</i></p>                                                                                                                                                                                                                                                                                                                                                                                          |
| 6. Documenting and evaluating practices | Who is evaluated and accountable?<br>How will the results of the evaluation made public (and what will they be used for)? | Who evaluates the practices and how? | <p><i>“The [Quebec End-of-Life] Act creates a Commission on End-of-Life Care for the whole province, but each institution does not appear to have any evaluation or control mechanism other than the Council of Physicians, Dentists and Pharmacists of Quebec.” [public]</i></p> <p><i>“What are the obligations imposed on the [healthcare] institution with regard with the quality of the patient’s environment? How will a calm and respectful environment be ensured for patients and their relatives, just like in palliative care units?” [professional]</i></p> <p><i>“What are the consequences for the physician if the End-of-Life Care Commission judges that he made a mistake?” [public]</i></p> <p><i>“Ultimately, will [the Commission] only give us statistics on the places where there is more MAiD and where there is less?” [public]</i></p> |

241

1  
2  
3 242 **Interpretation**  
4  
5

6 243 *Main findings*  
7

8 244 This study assessed information needs about MAiD from the collective perspective of  
9  
10 245 patients, health professionals and members of the public. Three key findings have been identified:  
11  
12 246 1) a majority of information needs are common to health professionals and members of the  
13  
14 247 public; 2) information needs evolve along the patient journey; 3) information needs go beyond  
15  
16 248 the medical and legal aspects of MAiD. Participants highlighted the needs to discuss the “human”  
17  
18 249 dimensions of MAiD, including its relational, symbolic, psychological and spiritual aspects as  
19  
20 250 opposed to a narrow focus on the technical dimensions of this practice. While some identified  
21  
22 251 information needs are straightforward to address (eg. definitions and legal criteria), others would  
23  
24 252 be more complex (eg. wait time and availability of MAiD in specific regions).  
25  
26  
27  
28

29 253  
30

31 254 *Findings in relation to existing literature*  
32

33  
34 255 Findings from this study resonate with a growing literature on public understanding of MAiD,  
35  
36 256 euthanasia, and end-of-life care, which have frequently highlighted confusion among different  
37  
38 257 end-of-life practices. (10, 27) A unique contribution is the study’s focus on information needs, as  
39  
40 258 opposed to documenting opinions, attitudes and preferences toward MAiD.  
41  
42

43 259  
44  
45 260 An important finding is the identification of common information needs among health  
46  
47 261 professionals and the public to support informed conversations and shared decision-making. This  
48  
49 262 finding is important, given the fact that current information strategies are usually focused on  
50  
51 263 professionals or patients separately. In addition to medical and legal criteria members of the  
52  
53  
54



1  
2  
3 264 public and healthcare professionals require information on the relational, psychological, symbolic  
4  
5 265 and human aspects of MAiD. Our findings call for greater collaboration between government,  
6  
7 266 public media, professional bodies, educational institutions, health institutions, researchers, patient  
8  
9  
10 267 organizations and other civil society to align their information strategies and meet specific  
11  
12 268 information needs a key junctions of patients' life journey.

13  
14 269 The study raised two issues that may warrant further investigation: (1) a need to explore how  
15  
16 270 information needs evolve along different illness trajectories (eg. Long-term chronic illness vs.  
17  
18 271 acute life-threatening conditions), (28) and (2) a need to identify how to optimally package  
19  
20 272 information to support individual reflections, meaningful conversations with relatives and  
21  
22 273 healthcare professionals, as well as decisions about MAiD. This appears particularly challenging  
23  
24 274 given the full range of information needs identified in this project, but also the need to translate  
25  
26 275 such complex and sensitive information for people with varying levels of literacy and the  
27  
28 276 evolution of identified information needs over time. (29)

29  
30  
31  
32  
33 277 *Limitations of the study*

34  
35 278 A few limitations should be noted. Although the study did not seek to compare the face-to-face  
36  
37 279 vs. online deliberation, a few differences in group interactions and dynamics were noted by the  
38  
39 280 research team, which may have impacted on results. Deliberation on a sensitive topic like MAiD  
40  
41 281 proved easier to discuss in face-to-face meeting than in the online platform, as it appeared to have  
42  
43 282 provided a "safe space" for participant discussion. We observed that face-to-face deliberations  
44  
45 283 were more interactive, with participants building on each others' arguments (as per deliberation  
46  
47 284 theory), while online deliberation appeared less conducive to the participation of some  
48  
49 285 individuals who remained more passive. As such, online deliberations did not act as a substitute  
50  
51 286 for face-to-face deliberations and may have limited in-depth input from rural participants.

1  
2  
3 287 Another limitation is the challenge of recruiting certain groups of participants including men,  
4  
5 288 physicians, health professionals from rural areas, and people who have unfavorable views toward  
6  
7 289 MAiD. Although patients and professionals were part of the research team of framed the  
8  
9  
10 290 questions, our data collection strategy was not piloted, which is a potential limitation. More  
11  
12 291 specifically, it was challenging at time to shift the dynamic from debate (eg. how should MAiD  
13  
14 292 criteria should be adapted?) to dialogue focused on information needs, partly because MAiD is  
15  
16 293 such a highly complex and sensitive topic. These challenges must be overcome in future  
17  
18 294 initiatives to pursue informed conversations about MAiD and end-of-life care more broadly. Of  
19  
20  
21 295 note, this study was conducted soon after the legalization of MAiD and we did not formally  
22  
23 296 assess the proportion of participants who had actual experience with this practice. Information  
24  
25  
26 297 needs should distinguish those with and without MAiD practice experience in future studies. The  
27  
28 298 study was only conducted among francophone participants from Quebec and its results should be  
29  
30  
31 299 contrasted with similar assessment in other parts of the country and cultural groups.

32  
33 300 *Conclusion*

34  
35 301 Health professionals and members of the public share common information needs on MAiD, and  
36  
37 302 seek information on the relational, emotional and symbolic aspects of this practice. These  
38  
39 303 findings call for concerted efforts to build a common information base and facilitate informed  
40  
41  
42 304 conversations on end-of-life care between professionals, patients and the public.  
43  
44  
45  
46  
47  
48  
49  
50  
51  
52  
53  
54  
55  
56  
57  
58  
59  
60

305

306 **References**

- 307 1. Quebec L. Act Respecting End-Of-Life Care 2017 [cited Bill 2]. Éditeur officiel du Québec:[17].  
 308 Available from: <http://legisquebec.gouv.qc.ca/en/pdf/cs/S-32.0001.pdf>.
- 309 2. Baker GR, Fancott C, Judd M, O'Connor P. Expanding patient engagement in quality  
 310 improvement and health system redesign. *Healthcare Management Forum*. 2016;29(5):176-82.
- 311 3. Canada Po. An Act to amend the Criminal Code and to make related amendments to other Acts  
 312 (medical assistance in dying) 2016 [cited Bill C-14]. 14]. Available from: [http://laws-](http://laws-lois.justice.gc.ca/PDF/2016_3.pdf)  
 313 [lois.justice.gc.ca/PDF/2016\\_3.pdf](http://laws-lois.justice.gc.ca/PDF/2016_3.pdf).
- 314 4. Meier EA, Gallegos JV, Thomas LP, Depp CA, Irwin SA, Jeste DV. Defining a Good Death  
 315 (Successful Dying): Literature Review and a Call for Research and Public Dialogue. *Am J Geriatr*  
 316 *Psychiatry*. 2016;24(4):261-71.
- 317 5. Freeman S, Smith TF, Neufeld E, Fisher K, Ebihara S. The wish to die among palliative home care  
 318 clients in Ontario, Canada: A cross-sectional study. *BMC Palliat Care*. 2016;15:24.
- 319 6. Badrakalimuthu V, Barclay S. Do people with dementia die at their preferred location of death? A  
 320 systematic literature review and narrative synthesis. *Age Ageing*. 2014;43(1):13-9.
- 321 7. Gentile D. Aide médicale à mourir : le travail de plusieurs médecins critiqué par la Commission  
 322 [Online news]. *Radio-Canada.ca: Société Radio-Canada* 2017; 2016 [cited 2016 30/06/2016]. Available  
 323 from: [http://ici.radio-canada.ca/nouvelle/790324/aide-medicale-mourir-medecins-critique-commission-](http://ici.radio-canada.ca/nouvelle/790324/aide-medicale-mourir-medecins-critique-commission-soins-fin-vie)  
 324 [soins-fin-vie](http://ici.radio-canada.ca/nouvelle/790324/aide-medicale-mourir-medecins-critique-commission-soins-fin-vie).
- 325 8. Lacoursière A. Aide médicale à mourir: ce n'est pas un "bar ouvert" [Online article].  
 326 [http://www.lapresse.ca/2016](http://www.lapresse.ca/2016/12/01/2016-12-01-4938873-aide-medicale-a-mourir-ce-nest-pas-un-bar-ouvert.php) [updated 12/01/2016]. Available from:  
 327 [http://www.lapresse.ca/actualites/sante/201601/11/01-4938873-aide-medicale-a-mourir-ce-nest-pas-](http://www.lapresse.ca/actualites/sante/201601/11/01-4938873-aide-medicale-a-mourir-ce-nest-pas-un-bar-ouvert.php)  
 328 [un-bar-ouvert.php](http://www.lapresse.ca/actualites/sante/201601/11/01-4938873-aide-medicale-a-mourir-ce-nest-pas-un-bar-ouvert.php).
- 329 9. Pelchat P. Aide médicale à mourir: Les Québécois confus: <http://www.lapresse.ca>; 2013.  
 330 Available from: [http://www.lapresse.ca/le-soleil/actualites/sante/201309/27/01-4694026-aide-](http://www.lapresse.ca/le-soleil/actualites/sante/201309/27/01-4694026-aide-medicale-a-mourir-les-quebecois-confus.php)  
 331 [medicale-a-mourir-les-quebecois-confus.php](http://www.lapresse.ca/le-soleil/actualites/sante/201309/27/01-4694026-aide-medicale-a-mourir-les-quebecois-confus.php).
- 332 10. Marcoux I, Boivin A, Arsenault C, Toupin M, Youssef J. Health care professionals' comprehension  
 333 of the legal status of end-of-life practices in Quebec: study of clinical scenarios. *Can Fam Physician*.  
 334 2015;61(4):e196-203.
- 335 11. Emanuel EJ, Onwuteaka-Philipsen BD, Urwin JW, Cohen J. Attitudes and Practices of Euthanasia  
 336 and Physician-Assisted Suicide in the United States, Canada, and Europe. *JAMA*. 2016;316(1):79-90.
- 337 12. Lavoie M, Godin G, Vezina-Im LA, Blondeau D, Martineau I, Roy L. Psychosocial determinants of  
 338 nurses' intention to practise euthanasia in palliative care. *Nurs Ethics*. 2016;23(1):48-60.
- 339 13. Lavoie M, Godin G, Vezina-Im LA, Blondeau D, Martineau I, Roy L. Psychosocial determinants of  
 340 physicians' intention to practice euthanasia in palliative care. *BMC Med Ethics*. 2015;16:6.
- 341 14. Evans L. Nurses' attitudes to assisted suicide: sociodemographic factors. *Br J Nurs*.  
 342 2015;24(12):629-32.
- 343 15. Claxton-Oldfield S, Miller K. A study of Canadian hospice palliative care volunteers' attitudes  
 344 toward physician-assisted suicide. *Am J Hosp Palliat Care*. 2015;32(3):305-12.

- 1  
2  
3 345 16. Teisceira-Lessard P. Les Canadiens appuient l'aide à mourir <http://www.lapresse.ca2014>  
4 346 [updated 09/10/2014]. Available from: <http://www.lapresse.ca/actualites/sante/201410/08/01-4807662-les-canadiens-appuient-laide-a-mourir.php>.  
5 347  
6 348 17. Vezina-Im LA, Lavoie M, Krol P, Olivier-D'Avignon M. Motivations of physicians and nurses to  
7 349 practice voluntary euthanasia: a systematic review. *BMC Palliat Care*. 2014;13(1):20.  
8 350 18. Bombard Y, Abelson J, Simeonov D, Gauvin FP. Citizens' perspectives on personalized medicine: a  
9 351 qualitative public deliberation study. *European journal of human genetics : EJHG*. 2013;21(11):1197-201.  
10 352 19. Fearon JD. Deliberation as discussion. . In: Elster J, editor. *Deliberative Democracy* Cambridge:  
11 353 Cambridge University Press.; 1998. p. 44-68.  
12 354 20. Yankelovich D FW. *Toward Wiser Public Judgment*. . Nashville, United States: Vanderbilt  
13 355 University Press; 2011. 176 pages p.  
14 356 21. J. B. *Public Deliberation: Pluralism, Complexity, and Democracy*. . Cambridge, MA: MIT Press;  
15 357 1996. 299 pages p.  
16 358 22. Lehoux P, Jimenez-Pernett J, Miller FA, Williams-Jones B. Assessment of a multimedia-based  
17 359 prospective method to support public deliberations on health technology design: participant survey  
18 360 findings and qualitative insights. *BMC Health Serv Res*. 2016;16(1):616.  
19 361 23. Boivin A, Lehoux P, Burgers J, Grol R. What are the key ingredients for effective public  
20 362 involvement in health care improvement and policy decisions? A randomized trial process evaluation.  
21 363 *Milbank Q*. 2014;92(2):319-50.  
22 364 24. Fereday J, Muir-Cochrane E. Demonstrating rigor using thematic analysis: A hybrid approach of  
23 365 inductive and deductive coding and theme development. *International journal of qualitative methods*.  
24 366 2006;5(1):80-92.  
25 367 25. Saunders B, Sim J, Kingstone T, Baker S, Waterfield J, Bartlam B, et al. Saturation in qualitative  
26 368 research: exploring its conceptualization and operationalization. *Quality & Quantity*. 2018;52(4):1893-  
27 369 907.  
28 370 26. Tong A, Sainsbury P, Craig J. Consolidated criteria for reporting qualitative research (COREQ): a  
29 371 32-item checklist for interviews and focus groups. *Int J Qual Health Care*. 2007;19(6):349-57.  
30 372 27. Marcoux I, Mishara BL, Durand C. Confusion between euthanasia and other end-of-life decisions:  
31 373 influences on public opinion poll results. *Can J Public Health*. 2007;98(3):235-9.  
32 374 28. Murray SA, Kendall M, Boyd K, Sheikh A. Illness trajectories and palliative care. *BMJ*.  
33 375 2005;330(7498):1007-11.  
34 376 29. Canada PHAo. About Health Literacy 2014 [updated 29/04/201406/06/2017]. Available from:  
35 377 <http://www.phac-aspc.gc.ca/cd-mc/hl-ls/index-eng.php - tabs-2>.  
36  
37  
38  
39  
40  
41 378  
42  
43  
44  
45  
46  
47  
48  
49  
50  
51  
52  
53  
54  
55  
56  
57  
58  
59  
60

1  
2  
3 3804  
5 381 **Appendix 1 Public deliberations protocol**6  
7 382 *Phase 1: Preparing short informational videos*

8  
9  
10 383 Four short informational videos (approximately 4-5 minutes each), were developed with  
11  
12 384 two medical and legal experts, each focusing on a specific aspect of MAiD: 1) what is MAiD; 2)  
13  
14 385 what are the eligibility criteria; 3) how MAiD is practiced; 4) how practices are evaluated and  
15  
16 386 monitored. The purpose of these videos was to prompt discussion about what participants know  
17  
18 387 or don't know, as well as what additional information do they need. The informational videos are  
19  
20 388 available online at <https://ceppp.ca/fr/que-doit-on-savoir-sur-laide-medicale-a-mourir/>.

21  
22  
23  
24  
25 389 *Phase 2: Recruitment of forum participants*

26  
27  
28 390 Recruitment strategy sought to include members of the public (including citizens,  
29  
30 391 patients, and caregivers), and healthcare professionals targeted by MAiD implementation  
31  
32 392 (physicians, nurses, pharmacists, managers, social workers, etc). Two key strategies were  
33  
34 393 implemented to recruit participants: 1) a call for applications to the patient partners network of  
35  
36 394 the *Direction collaboration et partenariat patient* at the Faculty of Medicine at the Université de  
37  
38 395 Montréal; and 2) a call for applications via social media (Twitter and Facebook) and mass  
39  
40 396 mailing lists of several organizational partners across the province of Quebec (organizations  
41  
42 397 representing patients and older adults, organizations promoting citizen engagement, and  
43  
44 398 professional bodies). Participants were compensated for their travel and time.

45  
46  
47 399 All interested candidates were asked to submit their application online. A purposeful  
48  
49 400 sampling strategy was used to recruit a diverse group of public members based on the following

1  
2  
3 401 criteria: age, gender, socioeconomic status, region, health status, personal experience with end-  
4  
5 402 of-life care as patient or caregiver, and attitude toward MAiD. Health professionals were also  
6  
7 403 selected to include a diversity of participants based on the following criteria: health discipline,  
8  
9 404 experience with end-of-life care, region, and level of support for MAiD. No selected candidates  
10  
11 405 refused or dropped out during the study.  
12  
13  
14

15 406 *Phase 3: Convening the forums*  
16  
17

18 407 A 1-day face-to-face forum, facilitated by an expert moderator unknown to the  
19  
20 408 participants and external to the team of authors, was held at the Research Centre of the University  
21  
22 409 of Montreal Hospital Centre (CR-CHUM) in Montreal on May 27, 2016. The moderator had  
23  
24 410 extensive experience in group deliberation and was hired from a not-for-profit organization with  
25  
26 411 expertise in citizen engagement (Institut du Nouveau Monde). Members of the public and health  
27  
28 412 professionals discussed separately the information videos in small group, with feedback in the  
29  
30 413 plenary session. After being presented each information video, participants were asked to reflect  
31  
32 414 on their information needs, discuss them with members of their small group, then summarize  
33  
34 415 their feedback to all participants.  
35  
36  
37  
38  
39

40 416 The online forum was held over a 3-week period. The goal of the online forum was to extend the  
41  
42 417 forum to participants living outside Montreal in other rural and urban areas of Quebec. During  
43  
44 418 the first half of the online forum discussion, participants were given access to the information  
45  
46 419 videos and asked to comment on their information needs. Online deliberations were hosted on the  
47  
48 420 deliberative platform Agora, supported by Institut du Nouveau Monde. Two moderators  
49  
50 421 facilitated online deliberations and produced weekly summaries of discussions for participants.  
51  
52  
53  
54  
55  
56  
57  
58  
59  
60

1  
2  
3 **Table 1.** Description of participants  
4  
5

|                             | <b>Members of the public (n, %)</b>                                                                                                            | <b>Health professionals (n, %)</b>                                                                                    |
|-----------------------------|------------------------------------------------------------------------------------------------------------------------------------------------|-----------------------------------------------------------------------------------------------------------------------|
| <b>Total</b>                | 50                                                                                                                                             | 35                                                                                                                    |
| <b>Gender</b>               | Male (14, 28 %)<br>Female (36, 72 %)                                                                                                           | Male (5, 14 %)<br>Female (30, 86 %)                                                                                   |
| <b>Age</b>                  | 18-45 (8, 16 %)<br>46-64 (20, 40 %)<br>65+ (22, 44 %)                                                                                          | 18-39 (12, 34 %)<br>40-50 (6, 17 %)<br>51+ (17, 49 %)                                                                 |
| <b>Annual family income</b> | Less than 20 000\$ (8, 16 %)<br>20 000\$ to 40 000\$ (16, 32 %)<br>40 000 to 60 000\$ (12, 24 %)<br>60 000\$+ (7, 14 %)<br>No answer (7, 14 %) | Not available                                                                                                         |
| <b>Attitude toward MAiD</b> | Very favorable (18, 36 %)<br>Favorable (22, 44 %)<br>Uncertain (6, 12 %)<br>Unfavorable (2, 4 %)<br>No answer (2, 4 %)                         | Very favorable (9, 26 %)<br>Favorable (15, 43 %)<br>Uncertain (8, 23 %)<br>Unfavorable (3, 8 %)<br>No answer (0, 0 %) |
| <b>Region</b>               | Urban (28, 56%)<br>Semi-urban (16, 32%)<br>Rural (6, 12%)                                                                                      | Urban (21, 60%)<br>Semi-urban (14, 40%)<br>Rural (0, 0%)                                                              |

2  
3  
4 **Table 2.** Information needs of the public and healthcare professionals regarding MAiD  
5  
6  
7  
8  
9  
10  
11  
12  
13  
14  
15  
16  
17  
18  
19  
20  
21  
22  
23  
24  
25  
26  
27  
28  
29  
30  
31  
32  
33

| <b>Stages of patient journey</b>                             | <b>Common needs expressed by professionals and members of the public</b>            | <b>Specific needs expressed by members of the public</b>                                          | <b>Illustrative quotes</b>                                                                                                                                                      |
|--------------------------------------------------------------|-------------------------------------------------------------------------------------|---------------------------------------------------------------------------------------------------|---------------------------------------------------------------------------------------------------------------------------------------------------------------------------------|
| 1. Reflections and discussions as the end of life approaches | Where can MAiD be delivered?<br>How does MAiD align with current (and future) laws? | How to distinguish MAiD from other end-of-life practices?<br>What are the eligibility criteria to | <i>“It seems that every time they come up with a new term, there is a whole new semantic field appearing, which escapes to ordinary mortals that are patients.”</i><br>[public] |

|                                        |                                                                                                                                                                                                                                                                                                                                                                          |                                                                                                                                                                                                      |                                                                                                                                                                                                                                                                                                                                                                                                                                                                                                                                                        |
|----------------------------------------|--------------------------------------------------------------------------------------------------------------------------------------------------------------------------------------------------------------------------------------------------------------------------------------------------------------------------------------------------------------------------|------------------------------------------------------------------------------------------------------------------------------------------------------------------------------------------------------|--------------------------------------------------------------------------------------------------------------------------------------------------------------------------------------------------------------------------------------------------------------------------------------------------------------------------------------------------------------------------------------------------------------------------------------------------------------------------------------------------------------------------------------------------------|
|                                        | <p>How to interpret the eligibility criteria?</p>                                                                                                                                                                                                                                                                                                                        | <p>MAiD?<br/><br/>How can a patient express his/her last wishes and ensure that it will be respected?</p>                                                                                            | <p><i>“Currently, the situation is ambiguous as to the role and obligations of some end-of-life care settings that seem to be resisting to the law”</i> [public]<br/><br/><i>“Who determines the time it takes (before death) for a patient to be considered in the end-of-life?”</i> [public].</p>                                                                                                                                                                                                                                                    |
| <p>2. Formulating request for MAiD</p> | <p>Who can make a request?<br/><br/>To whom a request can be made?<br/><br/>Is psychosocial support available when a patient is considering a request?<br/><br/>How to create the "openness" to initiate a conversation about MAiD with their relatives and healthcare professionals?<br/><br/>Where does MAiD fit along the full range of end-of-life care options?</p> | <p>When a request for MAiD can be made?</p>                                                                                                                                                          | <p><i>“What are the dispositions of the law for minors, dementia and all those who are not capable to consent? Can the representative of a patient (legal representative, family council, etc.) apply for MAiD?”</i> [professional]<br/><br/><i>“How can we create an openness between professionals and patients to discuss properly about all these choices?”</i> [public]<br/><br/><i>“...will psychological support be provided? Deciding of the day and time of one’s death is somehow empowering, but nevertheless distressing”</i> [public]</p> |
| <p>3. Evaluating requests</p>          | <p>How are requests evaluated and by whom?<br/>If a physician refuses to evaluate a request, how will the request be transferred to another physician?<br/>What is the scope of conscientious objection to MAiD?<br/>If there is a disagreement in the evaluation of the request, is there a mediation process?</p>                                                      | <p>What are the expected delays for evaluating a patient request?<br/>Can we have access to MAiD if we are experiencing psychological suffering only?</p>                                            | <p><i>“What is acceptable in terms of reasonable delay? ... If his condition worsens, can the patient get [MAiD] imminently?”</i> [public].<br/><br/><i>“If a physician refuses to practice MAiD and relies on the chief executive officer [to forward the request to another physician], how will the request be assessed in reasonable time? This is an urgent request since, to meet criteria, one must be dying!”</i> [professional]</p>                                                                                                           |
| <p>4. Communicating decisions</p>      | <p>How are decisions communicated, both in the case of approval and refusal?</p>                                                                                                                                                                                                                                                                                         | <p>If a patient changes his/her mind after his/her request is accepted, can he/she re-apply?<br/>Is it possible for a patient to apply to another physician if a first request has been refused?</p> | <p><i>“Will it be possible to see another doctor, if, for instance, I don’t meet all the criteria? Is there some form of mediation process?”</i> [public]</p>                                                                                                                                                                                                                                                                                                                                                                                          |



|                                                |                                                                                                                                                                                                                                                                                                                                                                                                                                                                                                                                                                                                                                                           |                                                                                                                                                             |                                                                                                                                                                                                                                                                                                                                                                                                                                                                                                                                                                                                                                                                                                                                                                                                                                                                                                                                                                                                                                                                                                                                                                                                                                                                                                                                                                                                                                                                                                  |
|------------------------------------------------|-----------------------------------------------------------------------------------------------------------------------------------------------------------------------------------------------------------------------------------------------------------------------------------------------------------------------------------------------------------------------------------------------------------------------------------------------------------------------------------------------------------------------------------------------------------------------------------------------------------------------------------------------------------|-------------------------------------------------------------------------------------------------------------------------------------------------------------|--------------------------------------------------------------------------------------------------------------------------------------------------------------------------------------------------------------------------------------------------------------------------------------------------------------------------------------------------------------------------------------------------------------------------------------------------------------------------------------------------------------------------------------------------------------------------------------------------------------------------------------------------------------------------------------------------------------------------------------------------------------------------------------------------------------------------------------------------------------------------------------------------------------------------------------------------------------------------------------------------------------------------------------------------------------------------------------------------------------------------------------------------------------------------------------------------------------------------------------------------------------------------------------------------------------------------------------------------------------------------------------------------------------------------------------------------------------------------------------------------|
| <p>5. Delivering MAiD</p>                      | <p>Are the necessary resources available in all institutions (and in all regions) to provide MAiD?<br/>         What is the waiting time for practicing MAiD once a request is accepted?<br/>         What is the role of the healthcare team and relatives during the process?<br/>         What support is provided to the care team and relatives before, during and after the administration of MAiD?<br/>         What are the possible harms and side-effects associated with administering MAiD?<br/>         What measures are in place to preserve the confidentiality of MAiD?<br/>         How to humanize the process of delivering MAiD?</p> | <p>How to ensure continuous communication between the patient and his/her physician, from the moment a request is made to the moment MAiD is delivered?</p> | <p><i>“...In a hospital, the doctor often changes every week. Several doctors may see the patient and the interviews are quite short. How can we make sure that [the dialogue] will be done to the patient’s satisfaction?”</i> [public]</p> <p><i>Where are the interdisciplinary team and, especially, the relatives? Are they excluded?”</i> [public]</p> <p><i>“Do we have support after? Are there any resources after all these steps? It is a pretty traumatic way to end a life! Nothing is mentioned in the law, as much for the health professionals, as for the patients and their relatives. I know there is an interdisciplinary support group for MAiD... but is it functional?”</i> [professional]</p> <p><i>“What are these drugs [used for MAiD]? Most importantly, what effect do they have on vital organs and on the brain? How can we measure the level of consciousness? Studies have shown that patients in the coma can feel pain even if they look peaceful in the outside!”</i> [public]</p> <p><i>“Is the injection method really foolproof? Could it happen, during the process, that something doesn’t work? We thought the patient was dying, but a problem occurs! Are there ways to solve these kinds of problems?”</i> [professional]</p> <p><i>“How can a hospital medical environment provide a meaningful set up for the patient receiving MAiD? For instance, would candles, usually not allowed in hospitals, be allowed for MAiD?”</i> [professional]</p> |
| <p>6. Documenting and evaluating practices</p> | <p>Who is evaluated and accountable?<br/>         How will the results of the evaluation made public (and what will they be used for)?</p>                                                                                                                                                                                                                                                                                                                                                                                                                                                                                                                | <p>Who evaluates the practices and how?</p>                                                                                                                 | <p><i>“The [Quebec End-of-Life] Act creates a Commission on End-of-Life Care for the whole province, but each institution does not appear to have any evaluation or control mechanism other</i></p>                                                                                                                                                                                                                                                                                                                                                                                                                                                                                                                                                                                                                                                                                                                                                                                                                                                                                                                                                                                                                                                                                                                                                                                                                                                                                              |

1  
2  
3  
4  
5  
6  
7  
8  
9  
10  
11  
12  
13  
14  
15  
16  
17  
18  
19  
20  
21  
22  
23  
24  
25  
26  
27  
28  
29  
30  
31  
32  
33  
34  
35  
36  
37  
38  
39  
40  
41  
42  
43  
44  
45  
46  
47

|  |  |  |                                                                                                                                                                                                                                                                                                                                                                                                                                                                                                                                                                                                                                                                              |
|--|--|--|------------------------------------------------------------------------------------------------------------------------------------------------------------------------------------------------------------------------------------------------------------------------------------------------------------------------------------------------------------------------------------------------------------------------------------------------------------------------------------------------------------------------------------------------------------------------------------------------------------------------------------------------------------------------------|
|  |  |  | <p><i>than the Council of Physicians, Dentists and Pharmacists of Quebec.” [public]</i></p> <p><i>“What are the obligations imposed on the [healthcare] institution with regard with the quality of the patient’s environment? How will a calm and respectful environment be ensured for patients and their relatives, just like in palliative care units?” [professional]</i></p> <p><i>“What are the consequences for the physician if the End-of-Life Care Commission judges that he made a mistake?” [public]</i></p> <p><i>“Ultimately, will [the Commission] only give us statistics on the places where there is more MAiD and where there is less?” [public]</i></p> |
|--|--|--|------------------------------------------------------------------------------------------------------------------------------------------------------------------------------------------------------------------------------------------------------------------------------------------------------------------------------------------------------------------------------------------------------------------------------------------------------------------------------------------------------------------------------------------------------------------------------------------------------------------------------------------------------------------------------|

Confidential
