# Supplementary material
Source: PubMed Central journal article supplement (PMC6450793)
Supplement: supp_7.2.E190_coreq-checklist.pdf [file supp_7.2.E190_coreq-checklist.pdf]

**Consolidated criteria for reporting qualitative studies (COREQ): 32-item checklist**

| No                                             | Item                                     | Guide questions/description                                                                                                                      | Manuscript line number |
|------------------------------------------------|------------------------------------------|--------------------------------------------------------------------------------------------------------------------------------------------------|------------------------|
| <b>Domain 1: Research team and reflexivity</b> |                                          |                                                                                                                                                  |                        |
| Personal Characteristics                       |                                          |                                                                                                                                                  |                        |
| 1.                                             | Interviewer/facilitator                  | Which author/s conducted the interview or focus group?                                                                                           | 154-159                |
| 2.                                             | Credentials                              | What were the researcher's credentials? <i>E.g. PhD, MD</i>                                                                                      | 165-167                |
| 3.                                             | Occupation                               | What was their occupation at the time of the study?                                                                                              | 154-159, 165-167       |
| 4.                                             | Gender                                   | Was the researcher male or female?                                                                                                               | 154-159, 165-167       |
| 5.                                             | Experience and training                  | What experience or training did the researcher have?                                                                                             | 154-159, 165-167       |
| Relationship with participants                 |                                          |                                                                                                                                                  |                        |
| 6.                                             | Relationship established                 | Was a relationship established prior to study commencement?                                                                                      | 154-156                |
| 7.                                             | Participant knowledge of the interviewer | What did the participants know about the researcher? <i>e.g. personal goals, reasons for doing the research</i>                                  | 154-156                |
| 8.                                             | Interviewer characteristics              | What characteristics were reported about the interviewer/facilitator? <i>e.g. Bias, assumptions, reasons and interests in the research topic</i> | 154-159                |
| <b>Domain 2: study design</b>                  |                                          |                                                                                                                                                  |                        |
| Theoretical framework                          |                                          |                                                                                                                                                  |                        |

|                       |                                       |                                                                                                                                                                 |          |
|-----------------------|---------------------------------------|-----------------------------------------------------------------------------------------------------------------------------------------------------------------|----------|
| 9.                    | Methodological orientation and Theory | What methodological orientation was stated to underpin the study? <i>e.g. grounded theory, discourse analysis, ethnography, phenomenology, content analysis</i> | 100-101  |
| Participant selection |                                       |                                                                                                                                                                 |          |
| 10.                   | Sampling                              | How were participants selected? <i>e.g. purposive, convenience, consecutive, snowball</i>                                                                       | 130-141  |
| 11.                   | Method of approach                    | How were participants approached? <i>e.g. face-to-face, telephone, mail, email</i>                                                                              | 130-134  |
| 12.                   | Sample size                           | How many participants were in the study?                                                                                                                        | 181      |
| 13.                   | Non-participation                     | How many people refused to participate or dropped out? Reasons?                                                                                                 | 141, 190 |
| Setting               |                                       |                                                                                                                                                                 |          |
| 14.                   | Setting of data collection            | Where was the data collected? <i>e.g. home, clinic, workplace</i>                                                                                               | 146-149  |
| 15.                   | Presence of non-participants          | Was anyone else present besides the participants and researchers?                                                                                               | 149      |
| 16.                   | Description of sample                 | What are the important characteristics of the sample? <i>e.g. demographic data, date</i>                                                                        | 180-190  |
| Data collection       |                                       |                                                                                                                                                                 |          |
| 17.                   | Interview guide                       | Were questions, prompts, guides provided by the authors? Was it pilot tested?                                                                                   | 143-145  |
| 18.                   | Repeat interviews                     | Were repeat interviews carried out? If yes, how many?                                                                                                           | 158      |
| 19.                   | Audio/visual recording                | Did the research use audio or visual recording to collect the data?                                                                                             | 146-148  |
| 20.                   | Field notes                           | Were field notes made during and/or after the interview or focus group?                                                                                         | 146-148  |
| 21.                   | Duration                              | What was the duration of the interviews or focus group?                                                                                                         | 109-112  |
| 22.                   | Data saturation                       | Was data saturation discussed?                                                                                                                                  | 172-174  |

|                                            |                                |                                                                                                                                          |                        |
|--------------------------------------------|--------------------------------|------------------------------------------------------------------------------------------------------------------------------------------|------------------------|
| 23.                                        | Transcripts returned           | Were transcripts returned to participants for comment and/or correction?                                                                 | 171-172                |
| <b>Domain 3:<br/>analysis and findings</b> |                                |                                                                                                                                          |                        |
| Data analysis                              |                                |                                                                                                                                          |                        |
| 24.                                        | Number of data coders          | How many data coders coded the data?                                                                                                     | 166                    |
| 25.                                        | Description of the coding tree | Did authors provide a description of the coding tree?                                                                                    | n/a                    |
| 26.                                        | Derivation of themes           | Were themes identified in advance or derived from the data?                                                                              | 163-165                |
| 27.                                        | Software                       | What software, if applicable, was used to manage the data?                                                                               | 174                    |
| 28.                                        | Participant checking           | Did participants provide feedback on the findings?                                                                                       | 171-172                |
| Reporting                                  |                                |                                                                                                                                          |                        |
| 29.                                        | Quotations presented           | Were participant quotations presented to illustrate the themes / findings? Was each quotation identified? e.g. <i>participant number</i> | 264 (Table 2)          |
| 30.                                        | Data and findings consistent   | Was there consistency between the data presented and the findings?                                                                       | 264, 267               |
| 31.                                        | Clarity of major themes        | Were major themes clearly presented in the findings?                                                                                     | 264 (Table 2)          |
| 32.                                        | Clarity of minor themes        | Is there a description of diverse cases or discussion of minor themes?                                                                   | 264 (Table 2), 268-301 |
